# Supplementary material for: Severity, course trajectory, and within‐person variability of individual symptoms in patients with major depressive disorder
Source: PubMed Central journal article supplement — Acta Psychiatr Scand. 2018 Dec 9;139(2):194–205. doi: 10.1111/acps.12987 (PMC6587785; doi:10.1111/acps.12987), 2018-12-09

### Mood symptoms

- 30. Leadен paralysis
- 10. Quality of mood
- 5. Feeling Sad
- 7. Anxious or tense
- 29. Interpersonal sensitivity
- 6. Feeling irritable
- 19. General interest
- 21. Capacity for pleasure
- 27. Panic/Phobic
- 8. Response of mood

### Cognitive Symptoms

- 16. View of myself
- 15. Concentration
- 17. View of my future
- 18. Death or suicide

### Somatic/Vegetative symptoms

- 20. Energy level
- 2. Sleep during the night
- 25. Aches and pains
- 1. Falling asleep
- 22. Interest in sex
- 24. Psychomotor agitation
- 26. Sympathetic arousal
- 11. Appetite
- 12. Weight
- 23. Psychomotor retardation
- 28. Constipation/diarrhea
- 3. Waking up too early
- 9a. Mood in relation to time of day
- 4. Sleeping too much

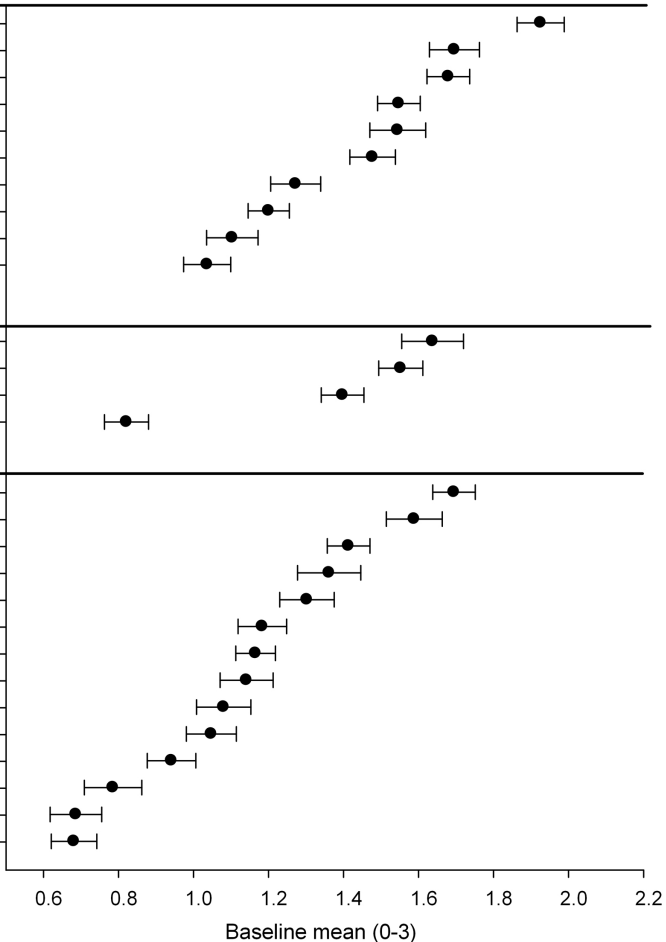

Supplement: ACPS-139-194-s001.pdf [file ACPS-139-194-s001.pdf]
