# Supplementary material for: Severity, course trajectory, and within‐person variability of individual symptoms in patients with major depressive disorder
Source: PubMed Central journal article supplement — Acta Psychiatr Scand. 2018 Dec 9;139(2):194–205. doi: 10.1111/acps.12987 (PMC6587785; doi:10.1111/acps.12987), 2018-12-09
Supplement: ACPS-139-194-s003.pdf [file ACPS-139-194-s003.pdf]

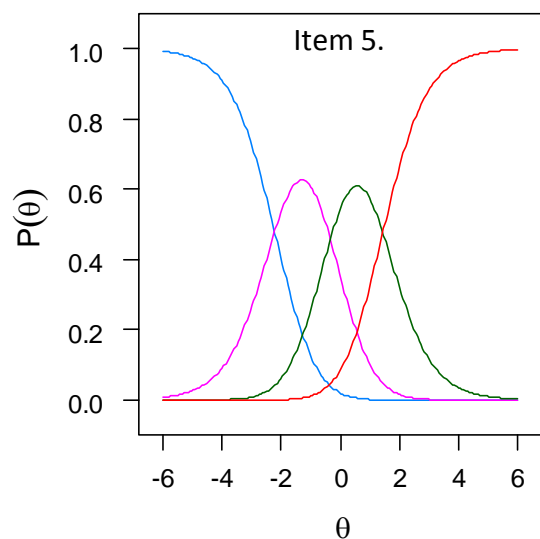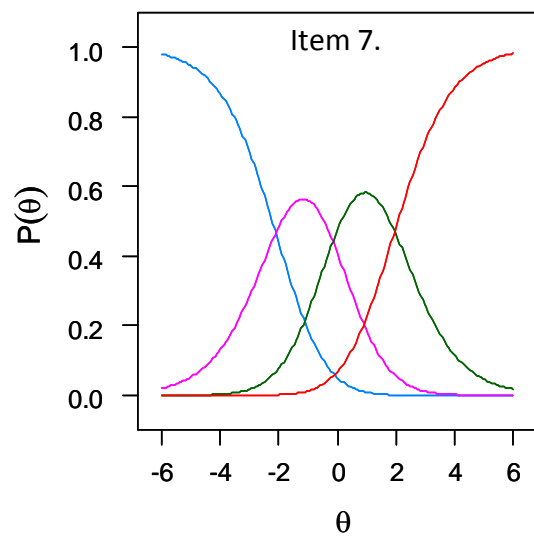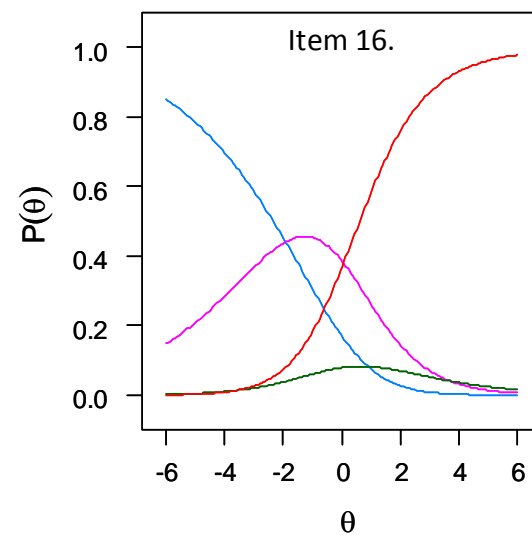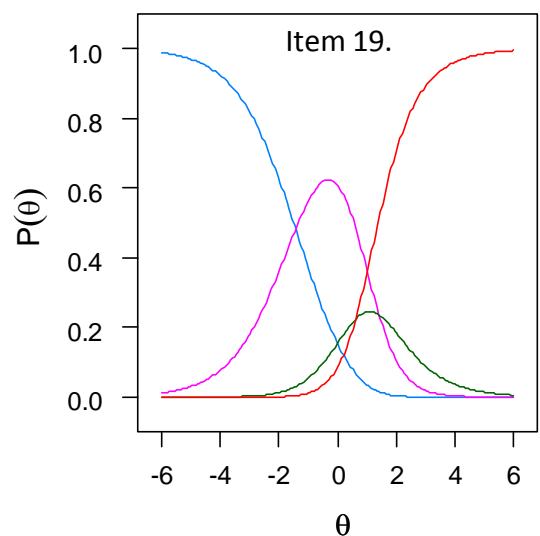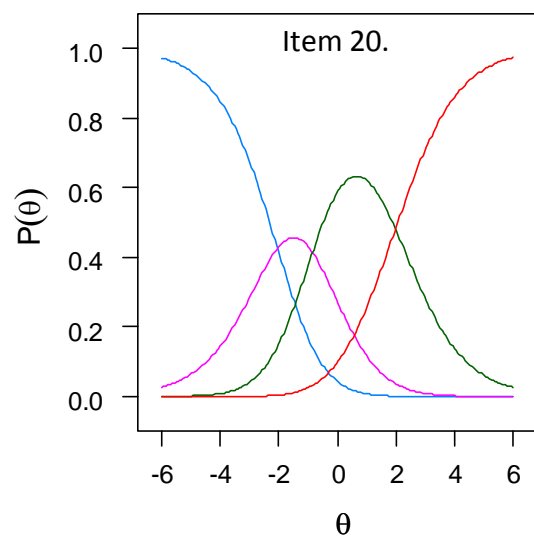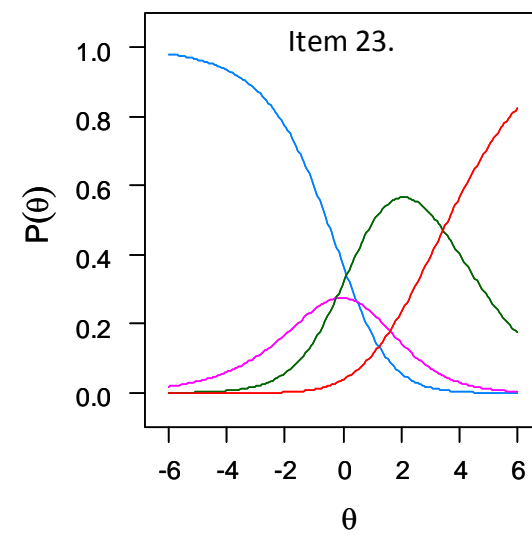

| Item                        | Loading | $h^2$ | a     | b1     | b2     | b3     |
|-----------------------------|---------|-------|-------|--------|--------|--------|
| 5. Feeling sad              | 0.605   | 0.366 | 1.293 | -2.223 | -0.334 | 1.444  |
| 7. Anxious or tense         | 0.504   | 0.254 | 0.993 | -2.104 | -0.148 | 1.963  |
| 16. View of myself          | 0.244   | 0.060 | 0.428 | -1.919 | 3.714  | -3.577 |
| 19. General interest        | 0.493   | 0.243 | 0.964 | -1.430 | 1.423  | 0.618  |
| 20. Energy level            | 0.469   | 0.220 | 0.903 | -2.046 | -0.848 | 1.989  |
| 23. Psychomotor retardation | 0.338   | 0.114 | 0.611 | 0.489  | -0.228 | 3.454  |

Note. Loadings denote as component loadings.  $h^2$  denotes as the variances accounted for in each item.

a denotes item's discrimination parameter. b1, b2, and b3 denotes the generalized partial credit model parameter estimates.  $\Theta$  denotes the latent variable.  $P\Theta$  denotes the probability of corresponding to latent variable.
