# Supplementary material for: Severity, course trajectory, and within‐person variability of individual symptoms in patients with major depressive disorder
Source: PubMed Central journal article supplement — Acta Psychiatr Scand. 2018 Dec 9;139(2):194–205. doi: 10.1111/acps.12987 (PMC6587785; doi:10.1111/acps.12987), 2018-12-09
Supplement: ACPS-139-194-s004.pdf [file ACPS-139-194-s004.pdf]

| Supplementary material table 1. Item response theory analysis of the IDS-SR 30 |         |                |       |        |        |        |
|--------------------------------------------------------------------------------|---------|----------------|-------|--------|--------|--------|
| Item                                                                           | Loading | h <sup>2</sup> | a     | b1     | b2     | b3     |
| 1. Falling asleep                                                              | 0.096   | 0.009          | 0.164 | 5.147  | -2.621 | -0.080 |
| 2. Sleep during the night                                                      | 0.105   | 0.011          | 0.179 | -4.045 | 2.994  | -1.731 |
| 3. Waking up too early                                                         | 0.123   | 0.015          | 0.211 | 6.359  | 0.695  | 0.859  |
| 4. Sleeping too much                                                           | 0.091   | 0.008          | 0.155 | 3.790  | 6.191  | 5.334  |
| 5. Feeling sad                                                                 | 0.622   | 0.386          | 1.350 | -2.210 | -0.306 | 1.414  |
| 6. Feeling irritable                                                           | 0.418   | 0.175          | 0.784 | -1.996 | 0.065  | 2.061  |
| 7. Anxious or tense                                                            | 0.538   | 0.289          | 1.086 | -2.029 | -0.121 | 1.870  |
| 8. Response of mood                                                            | 0.549   | 0.302          | 1.119 | -0.486 | 0.764  | 2.120  |
| 9a. Mood in time of day                                                        | 0.059   | 0.004          | 0.101 | 6.395  | 18.799 | -8.212 |
| 10. Quality of mood                                                            | 0.230   | 0.053          | 0.402 | -3.505 | 0.356  | 0.684  |
| 11. Appetite                                                                   | 0.201   | 0.040          | 0.349 | -1.454 | 3.635  | -0.042 |
| 12. Weight                                                                     | 0.100   | 0.010          | 0.172 | 0.514  | 3.376  | 2.243  |
| 15. Concentration                                                              | 0.446   | 0.199          | 0.847 | -2.448 | 0.179  | 1.570  |
| 16. View of myself                                                             | 0.260   | 0.068          | 0.458 | -1.836 | 3.478  | -3.304 |
| 17. View of my future                                                          | 0.555   | 0.308          | 1.136 | -2.564 | 0.994  | 1.219  |
| 18. Death or suicide                                                           | 0.348   | 0.121          | 0.632 | 0.111  | 1.409  | 3.602  |
| 19. General interest                                                           | 0.506   | 0.256          | 0.999 | -1.395 | 1.398  | 0.620  |
| 20. Energy level                                                               | 0.477   | 0.228          | 0.925 | -2.041 | -0.816 | 1.957  |
| 21. Capacity for pleasure                                                      | 0.689   | 0.474          | 1.616 | -1.263 | 0.684  | 1.999  |
| 22. Interest in sex                                                            | 0.271   | 0.074          | 0.480 | -0.658 | 0.339  | 1.761  |
| 23. Psychomotor retardation                                                    | 0.360   | 0.130          | 0.657 | 0.437  | -0.177 | 3.277  |
| 24. Psychomotor agitation                                                      | 0.184   | 0.034          | 0.319 | -0.655 | 0.070  | 5.193  |
| 25. Aches and pains                                                            | 0.269   | 0.072          | 0.475 | -3.100 | 0.567  | 3.820  |
| 26. Sympathetic arousal                                                        | 0.310   | 0.096          | 0.554 | -2.184 | 1.125  | 4.956  |
| 27. Panic/phobic                                                               | 0.233   | 0.055          | 0.409 | 0.047  | 0.484  | 3.117  |
| 28. Constipation/diarrhea                                                      | 0.183   | 0.034          | 0.317 | 0.037  | 2.179  | 3.729  |
| 29. Interpersonal sensitivity                                                  | 0.306   | 0.094          | 0.548 | -2.238 | -2.190 | 1.095  |
| 30. Leaden paralysis                                                           | 0.411   | 0.169          | 0.767 | -2.764 | -0.737 | 0.620  |

Note. Loadings denote as component loadings. h<sup>2</sup> denotes as the variances accounted for in each item. a denotes item's discrimination parameter. b1, b2, and b3 denotes the generalized partial credit model parameter estimates.
