# Supplementary material for: Severity, course trajectory, and within‐person variability of individual symptoms in patients with major depressive disorder
Source: PubMed Central journal article supplement — Acta Psychiatr Scand. 2018 Dec 9;139(2):194–205. doi: 10.1111/acps.12987 (PMC6587785; doi:10.1111/acps.12987), 2018-12-09
Supplement: ACPS-139-194-s005.pdf [file ACPS-139-194-s005.pdf]

| Supplementary material table 2. Sensitivity analysis, values adjusted for a history of chronic depression, chronic somatic disease, age, or the use of antidepressants |                                 |                                      |                                         |                                       |                                            |                        |                                               |                                       |                                            |                        |                                               |                                       |                                            |                        |
|------------------------------------------------------------------------------------------------------------------------------------------------------------------------|---------------------------------|--------------------------------------|-----------------------------------------|---------------------------------------|--------------------------------------------|------------------------|-----------------------------------------------|---------------------------------------|--------------------------------------------|------------------------|-----------------------------------------------|---------------------------------------|--------------------------------------------|------------------------|
| Item                                                                                                                                                                   | Baseline mean                   | Baseline mean                        | Baseline Mean                           | One-year slope                        | One-year slope                             | One-year slope         | One-year slope                                | One-year slope                        | Nine-year slope                            | Nine-year slope        | Nine-year slope                               | Nine-year slope                       | FVU adjusted                               | FVU adjusted           |
|                                                                                                                                                                        | adjusted for chronic depression | adjusted for chronic somatic disease | adjusted for the use of antidepressants | slope adjusted for chronic depression | slope adjusted for chronic somatic disease | slope adjusted for age | slope adjusted for the use of antidepressants | slope adjusted for chronic depression | slope adjusted for chronic somatic disease | slope adjusted for age | slope adjusted for the use of antidepressants | slope adjusted for chronic depression | slope adjusted for chronic somatic disease | for chronic depression |
| 1. Falling asleep                                                                                                                                                      | 1.26 (0.05)                     | 1.34 (0.07)                          | 1.31 (0.06)                             | -0.459 (0.07)                         | -0.459 (0.07)                              | -0.459 (0.04)          | -0.458 (0.07)                                 | -0.001 (0.010)                        | -0.001 (0.010)                             | 0.000 (0.010)          | 0.000 (0.010)                                 | 0.464 (0.020)                         | 0.473 (0.027)                              | 0.475 (0.022)          |
| 2. Sleep during the night                                                                                                                                              | 1.57 (0.05)                     | 1.53 (0.06)                          | 1.60 (0.05)                             | -0.224 (0.06)                         | -0.227 (0.06)                              | -0.243 (0.04)          | -0.227 (0.06)                                 | 0.049 (0.008)                         | 0.048 (0.008)                              | 0.047 (0.008)          | 0.049 (0.008)                                 | 0.620 (0.019)                         | 0.597 (0.023)                              | 0.618 (0.019)          |
| 3. Waking up too early                                                                                                                                                 | 0.77 (0.05)                     | 0.73 (0.06)                          | 0.80 (0.05)                             | -0.180 (0.08)                         | -0.186 (0.08)                              | -0.202 (0.04)          | -0.188 (0.08)                                 | 0.042 (0.011)                         | 0.043 (0.011)                              | 0.040 (0.011)          | 0.043 (0.011)                                 | 0.361 (0.021)                         | 0.340 (0.027)                              | 0.360 (0.022)          |
| 4. Sleeping too much                                                                                                                                                   | 0.63 (0.04)                     | 0.67 (0.05)                          | 0.54 (0.04)                             | -0.248 (0.08)                         | -0.256 (0.08)                              | -0.246 (0.03)          | -0.254 (0.08)                                 | -0.015 (0.013)                        | -0.015 (0.013)                             | -0.019 (0.013)         | -0.018 (0.012)                                | 0.418 (0.022)                         | 0.428 (0.027)                              | 0.391 (0.022)          |
| 5. Feeling Sad                                                                                                                                                         | 1.52 (0.04)                     | 1.67 (0.05)                          | 1.60 (0.04)                             | -0.926 (0.07)                         | -0.937 (0.07)                              | -0.938 (0.03)          | -0.937 (0.07)                                 | -0.035 (0.009)                        | -0.033 (0.009)                             | -0.035 (0.009)         | -0.035 (0.009)                                | 0.590 (0.018)                         | 0.579 (0.024)                              | 0.577 (0.020)          |
| 6. Feeling irritable                                                                                                                                                   | 1.42 (0.04)                     | 1.44 (0.05)                          | 1.50 (0.04)                             | -0.711 (0.07)                         | -0.720 (0.07)                              | -0.716 (0.03)          | -0.720 (0.07)                                 | -0.014 (0.009)                        | -0.014 (0.009)                             | -0.013 (0.009)         | -0.014 (0.009)                                | 0.598 (0.019)                         | 0.585 (0.023)                              | 0.602 (0.019)          |
| 7. Anxious or tense                                                                                                                                                    | 1.42 (0.04)                     | 1.46 (0.05)                          | 1.45 (0.04)                             | -0.826 (0.07)                         | -0.836 (0.07)                              | -0.836 (0.03)          | -0.837 (0.07)                                 | -0.002 (0.008)                        | -0.003 (0.008)                             | -0.003 (0.008)         | -0.004 (0.008)                                | 0.613 (0.019)                         | 0.610 (0.024)                              | 0.618 (0.019)          |
| 8. Response of mood                                                                                                                                                    | 0.91 (0.04)                     | 1.06 (0.05)                          | 0.89 (0.04)                             | -0.742 (0.07)                         | -0.746 (0.07)                              | -0.750 (0.03)          | -0.745 (0.07)                                 | -0.035 (0.010)                        | -0.034 (0.010)                             | -0.036 (0.010)         | -0.036 (0.010)                                | 0.424 (0.021)                         | 0.444 (0.027)                              | 0.420 (0.022)          |
| 9a. Mood in time of day                                                                                                                                                | 0.70 (0.04)                     | 0.79 (0.06)                          | 0.61 (0.04)                             | -0.073 (0.07)                         | -0.061 (0.07)                              | -0.059 (0.04)          | -0.060 (0.07)                                 | -0.014 (0.011)                        | -0.011 (0.011)                             | -0.010 (0.011)         | -0.013 (0.011)                                | 0.433 (0.021)                         | 0.435 (0.027)                              | 0.400 (0.023)          |
| 10. Quality of mood                                                                                                                                                    | 1.65 (0.05)                     | 1.65 (0.06)                          | 1.62 (0.05)                             | -0.602 (0.07)                         | -0.600 (0.07)                              | -0.596 (0.03)          | -0.600 (0.07)                                 | -0.044 (0.009)                        | -0.044 (0.009)                             | -0.044 (0.009)         | -0.044 (0.009)                                | 0.558 (0.020)                         | 0.537 (0.026)                              | 0.570 (0.021)          |
| 11. Appetite                                                                                                                                                           | 1.12 (0.05)                     | 1.09 (0.06)                          | 1.07 (0.05)                             | -0.527 (0.07)                         | -0.518 (0.07)                              | -0.511 (0.04)          | -0.516 (0.07)                                 | -0.046 (0.009)                        | -0.047 (0.009)                             | -0.046 (0.009)         | -0.046 (0.009)                                | 0.497 (0.021)                         | 0.484 (0.027)                              | 0.504 (0.022)          |
| 12. Weight                                                                                                                                                             | 1.09 (0.05)                     | 1.04 (0.06)                          | 1.04 (0.05)                             | -0.189 (0.06)                         | -0.191 (0.06)                              | -0.188 (0.04)          | -0.190 (0.06)                                 | -0.001 (0.008)                        | -0.003 (0.008)                             | -0.002 (0.008)         | -0.002 (0.008)                                | 0.581 (0.019)                         | 0.561 (0.025)                              | 0.602 (0.020)          |
| 15. Concentration                                                                                                                                                      | 1.42 (0.04)                     | 1.52 (0.05)                          | 1.51 (0.04)                             | -0.802 (0.07)                         | -0.808 (0.07)                              | -0.809 (0.03)          | -0.808 (0.07)                                 | -0.025 (0.008)                        | -0.025 (0.008)                             | -0.026 (0.008)         | -0.026 (0.008)                                | 0.631 (0.020)                         | 0.572 (0.025)                              | 0.657 (0.019)          |
| 16. View of myself                                                                                                                                                     | 1.48 (0.05)                     | 1.75 (0.07)                          | 1.53 (0.06)                             | -0.582 (0.07)                         | -0.581 (0.07)                              | -0.577 (0.04)          | -0.580 (0.07)                                 | -0.014 (0.009)                        | -0.012 (0.009)                             | -0.012 (0.009)         | -0.014 (0.009)                                | 0.519 (0.021)                         | 0.507 (0.026)                              | 0.520 (0.022)          |
| 17. View of my future                                                                                                                                                  | 1.25 (0.04)                     | 1.40 (0.05)                          | 1.29 (0.04)                             | -0.568 (0.08)                         | -0.575 (0.08)                              | -0.582 (0.03)          | -0.575 (0.08)                                 | 0.011 (0.009)                         | 0.012 (0.009)                              | 0.011 (0.009)          | 0.011 (0.009)                                 | 0.604 (0.019)                         | 0.556 (0.026)                              | 0.616 (0.020)          |
| 18. Death or suicide                                                                                                                                                   | 0.74 (0.04)                     | 0.83 (0.05)                          | 0.70 (0.04)                             | -0.640 (0.08)                         | -0.649 (0.07)                              | -0.651 (0.03)          | -0.647 (0.07)                                 | -0.004 (0.013)                        | -0.004 (0.013)                             | -0.004 (0.013)         | -0.005 (0.013)                                | 0.313 (0.020)                         | 0.317 (0.025)                              | 0.345 (0.022)          |
| 19. General interest                                                                                                                                                   | 1.17 (0.04)                     | 1.25 (0.06)                          | 1.18 (0.05)                             | -0.764 (0.07)                         | -0.773 (0.07)                              | -0.773 (0.03)          | -0.773 (0.07)                                 | -0.018 (0.009)                        | -0.018 (0.009)                             | -0.018 (0.009)         | -0.018 (0.009)                                | 0.550 (0.020)                         | 0.511 (0.027)                              | 0.537 (0.022)          |
| 20. Energy level                                                                                                                                                       | 1.61 (0.04)                     | 1.62 (0.05)                          | 1.58 (0.04)                             | -0.986 (0.07)                         | -0.993 (0.07)                              | -0.995 (0.03)          | -0.993 (0.07)                                 | -0.017 (0.008)                        | -0.017 (0.008)                             | -0.017 (0.008)         | -0.017 (0.008)                                | 0.619 (0.019)                         | 0.566 (0.025)                              | 0.612 (0.019)          |
| 21. Capacity for pleasure                                                                                                                                              | 1.08 (0.03)                     | 1.16 (0.05)                          | 1.09 (0.04)                             | -0.952 (0.08)                         | -0.956 (0.07)                              | -0.960 (0.03)          | -0.956 (0.07)                                 | -0.022 (0.009)                        | -0.022 (0.009)                             | -0.024 (0.009)         | -0.023 (0.009)                                | 0.487 (0.021)                         | 0.475 (0.027)                              | 0.482 (0.022)          |
| 22. Interest in sex                                                                                                                                                    | 1.22 (0.05)                     | 1.24 (0.06)                          | 1.14 (0.05)                             | -0.428 (0.07)                         | -0.434 (0.07)                              | -0.442 (0.04)          | -0.433 (0.07)                                 | 0.030 (0.010)                         | 0.030 (0.010)                              | 0.030 (0.010)          | 0.030 (0.010)                                 | 0.536 (0.020)                         | 0.522 (0.026)                              | 0.540 (0.021)          |
| 23. Psychomotor retardation                                                                                                                                            | 0.96 (0.04)                     | 0.96 (0.05)                          | 0.89 (0.04)                             | -0.675 (0.08)                         | -0.674 (0.08)                              | -0.679 (0.03)          | -0.675 (0.08)                                 | -0.008 (0.011)                        | -0.009 (0.011)                             | -0.010 (0.011)         | -0.010 (0.011)                                | 0.363 (0.021)                         | 0.368 (0.027)                              | 0.376 (0.022)          |
| 24. Psychomotor agitation                                                                                                                                              | 1.13 (0.04)                     | 1.16 (0.05)                          | 1.19 (0.05)                             | -0.487 (0.07)                         | -0.492 (0.07)                              | -0.495 (0.03)          | -0.492 (0.07)                                 | -0.037 (0.009)                        | -0.038 (0.009)                             | -0.038 (0.009)         | -0.038 (0.009)                                | 0.446 (0.021)                         | 0.463 (0.026)                              | 0.474 (0.022)          |
| 25. Aches and pains                                                                                                                                                    | 1.36 (0.04)                     | 1.17 (0.05)                          | 1.40 (0.04)                             | -0.372 (0.07)                         | -0.377 (0.07)                              | -0.383 (0.03)          | -0.376 (0.07)                                 | 0.038 (0.009)                         | 0.038 (0.009)                              | 0.039 (0.009)          | 0.040 (0.009)                                 | 0.628 (0.019)                         | 0.601 (0.024)                              | 0.651 (0.019)          |
| 26. Sympathetic arousal                                                                                                                                                | 1.12 (0.03)                     | 1.02 (0.04)                          | 1.08 (0.04)                             | -0.536 (0.07)                         | -0.544 (0.07)                              | -0.555 (0.03)          | -0.544 (0.07)                                 | 0.014 (0.009)                         | 0.013 (0.009)                              | 0.013 (0.009)          | 0.014 (0.009)                                 | 0.557 (0.020)                         | 0.542 (0.025)                              | 0.545 (0.021)          |
| 27. Panic/Phobic                                                                                                                                                       | 1.03 (0.04)                     | 1.09 (0.06)                          | 1.00 (0.04)                             | -0.596 (0.07)                         | -0.601 (0.07)                              | -0.600 (0.04)          | -0.600 (0.07)                                 | 0.004 (0.009)                         | 0.004 (0.009)                              | 0.005 (0.009)          | 0.003 (0.009)                                 | 0.489 (0.020)                         | 0.495 (0.027)                              | 0.498 (0.022)          |
| 28. Constipation/diarrhea                                                                                                                                              | 0.91 (0.04)                     | 0.72 (0.05)                          | 0.92 (0.04)                             | -0.408 (0.07)                         | -0.411 (0.07)                              | -0.416 (0.03)          | -0.414 (0.07)                                 | 0.001 (0.010)                         | 0.000 (0.010)                              | 0.002 (0.010)          | 0.002 (0.010)                                 | 0.526 (0.020)                         | 0.502 (0.025)                              | 0.518 (0.021)          |
| 29. Interpersonal sensitivity                                                                                                                                          | 1.38 (0.05)                     | 1.55 (0.06)                          | 1.46 (0.05)                             | -0.528 (0.07)                         | -0.532 (0.07)                              | -0.524 (0.04)          | -0.531 (0.07)                                 | -0.017 (0.009)                        | -0.015 (0.009)                             | -0.013 (0.009)         | -0.016 (0.009)                                | 0.616 (0.019)                         | 0.633 (0.023)                              | 0.629 (0.020)          |
| 30. Leadен paralysis                                                                                                                                                   | 1.79 (0.04)                     | 1.80 (0.05)                          | 1.78 (0.04)                             | -0.697 (0.06)                         | -0.694 (0.06)                              | -0.696 (0.03)          | -0.693 (0.06)                                 | -0.003 (0.009)                        | -0.004 (0.009)                             | -0.002 (0.009)         | -0.003 (0.009)                                | 0.636 (0.018)                         | 0.634 (0.024)                              | 0.633 (0.020)          |

Note. Mean values, standard error (in parentheses), 1-year slope, sum-score adjusted 9-year slope, and fraction of variance unexplained (FVU;  $\Sigma(y_i - \hat{y}_i)^2/\Sigma(y_i - \bar{y})^2$ ) for each of the individual symptoms of the Inventory of Depressive Symptomatology- Self-Report (IDS-SR) adjusted for history of chronic depression (24 out of 48 months prior to baseline), chronic somatic disease, age (only slopes), or the use of antidepressants.
