# Supplementary figures and images for: Severity, course trajectory, and within‐person variability of individual symptoms in patients with major depressive disorder
Source: PubMed Central journal article supplement — Acta Psychiatr Scand. 2018 Dec 9;139(2):194–205. doi: 10.1111/acps.12987 (PMC6587785; doi:10.1111/acps.12987), 2018-12-09

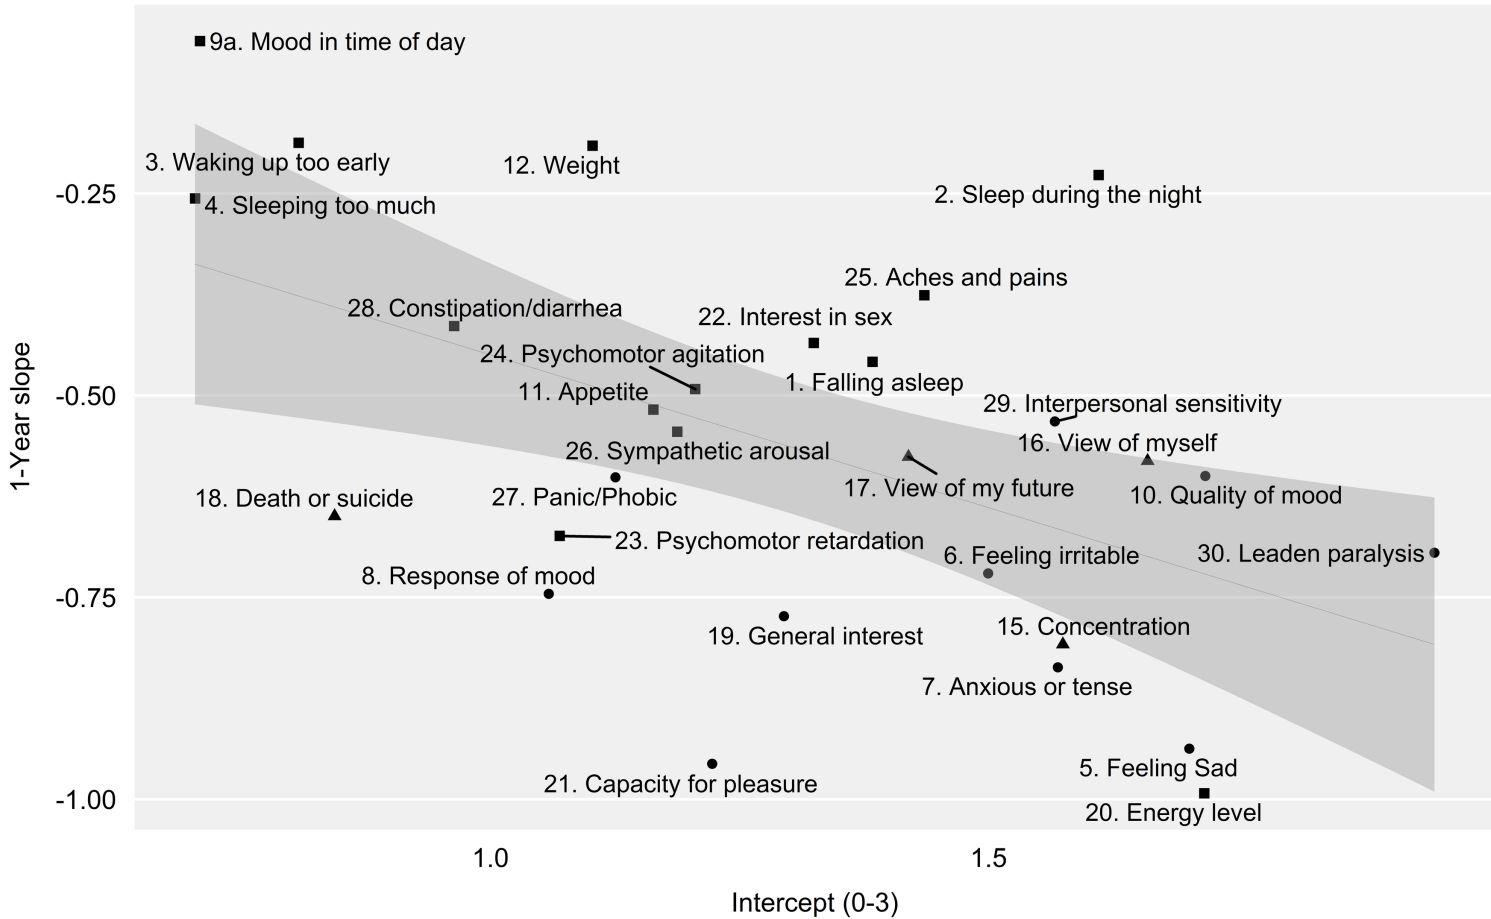

Supplement: ACPS-139-194-s002.pdf [file ACPS-139-194-s002.pdf]
